# Supplementary material for: Sex differences and risk factors for bleeding in Alagille syndrome
Source: PubMed Central journal article supplement (PMC9728057; doi:10.15252/emmm.202215809), 2022-11-08
Supplement: EMMM-14-e15809-s008.pdf [file EMMM-14-e15809-s008.pdf]

**Table EV1**

| Diagnosis       | Sex | Age eye exam (y) | Bilirubin total/ conjugated (μM/L) | Bile acids (μM/L) | INR   | Platelet count (10 <sup>9</sup> /L) | Vascular event (age of event, * denotes age for which blood analysis at right is described)                        | Bilirubin total/ conjugated (μM/L) | Bile acids (μM/L) | INR   | Platelet count (10 <sup>9</sup> /L) | Follow up until (y) |
|-----------------|-----|------------------|------------------------------------|-------------------|-------|-------------------------------------|--------------------------------------------------------------------------------------------------------------------|------------------------------------|-------------------|-------|-------------------------------------|---------------------|
| reference value |     |                  | 16/4                               | < 7               | < 1.2 | 200-400                             |                                                                                                                    | 16/4                               | < 7               | < 1.2 | 200-400                             |                     |
| ALGS            | F   | 9                | 76/58                              | 239               | 1.21  | 141                                 | Surgery-related hemorrhage (10*), nosebleed (15), GI bleed (Grade 1 at 10, Grade 4 at 17), splenic infarction (18) | 58/39                              | 239               | 1.38  | 117                                 | 18                  |
| ALGS            | F   | 10               | 6/1                                | 11                | 1.02  | 281                                 | Nosebleed (10*)                                                                                                    | 6/1                                | 11                | 1.02  | 281                                 | 18                  |
| ALGS            | F   | 12               | 9/2                                | 25                | 1     | 267                                 | N/A                                                                                                                |                                    |                   |       |                                     | 18                  |
| ALGS            | F   | 2                | 6/<2                               | 3                 | 1     | 486                                 | N/A                                                                                                                |                                    |                   |       |                                     | 6                   |
| ALGS            | F   | 5                | 4/<2                               | 3                 | 1     | 295                                 | N/A                                                                                                                |                                    |                   |       |                                     | 13                  |
| ALGS            | M   | 4                | 5/<2                               | 3                 | 1     | 334                                 | Coagulopathy-related bleed (1m*)                                                                                   | 62/37                              | 79                | >8    | 417                                 | 4                   |
| BA              | F   | 8                | 24/8                               | 285               | 1.14  | 65                                  | Bruising (9*), esophageal varices (10)                                                                             | 32/16                              | 312               | 1.17  | 60                                  | 18                  |
| BA              | M   | 15               |                                    |                   |       |                                     | N/A                                                                                                                |                                    |                   |       |                                     | 18                  |
| BA              | F   | 11               | 8/1                                | 4                 | 0.99  | 141                                 | Nosebleed, GI bleeding, bruising (all three events at age 14* and 15)                                              | 6/1                                |                   | 0.9   | 222                                 | 18                  |
| BA              | F   | 10               | 11/3                               |                   | 1.2   | 67                                  | GI bleeding (7*)                                                                                                   | 5/1                                |                   | 1.16  | 58                                  | 18                  |
