# Supplementary material for: Sex differences and risk factors for bleeding in Alagille syndrome
Source: PubMed Central journal article supplement (PMC9728057; doi:10.15252/emmm.202215809), 2022-11-08
Supplement: EMMM-14-e15809-s013.pdf [file EMMM-14-e15809-s013.pdf]

## Expanded View Figures

### Figure EV1. *Jag1<sup>Ndr/Ndr</sup>* mice display thinner skulls.

- A Micro computed tomography ( $\mu$ CT) of P30 skulls. Blue arrow marks side skull protrusions in *Jag1<sup>Ndr/Ndr</sup>* mice.
- B, C (B) Color map displaying skull full thickness. (C) Cross-section of dorsal cranium in fully segmented skull.
- D, E (D) Color map displaying cranial compact bone thickness. (E) Cross-section of dorsal cranium of segmented compact bones.
- F Skull length from occipital bone to nasal bone (measured in mid line), ( $n = 5-6$  per group, Two-way ANOVA followed by Šídák's multiple comparison test, Interaction  $P = 0.9309$ , Sex  $P = 0.0069$ , Genotype  $**P = 0.0071$ ).
- G, H (G) Segmented temporal bone. (H) Temporal bone volume ( $n = 5-6$  per group, Two-way ANOVA followed by Šídák's multiple comparison test, Interaction  $P = 0.9960$ , Sex  $P = 0.3691$ , Genotype  $*P = 0.0249$ ).

Data information: Bar graphs depict mean values  $\pm$  standard deviation, each dot represents one biological replicate. Circles represent females, squares represent males.

For details/results of statistical analyses, please see source data.

Source data are available online for this figure.

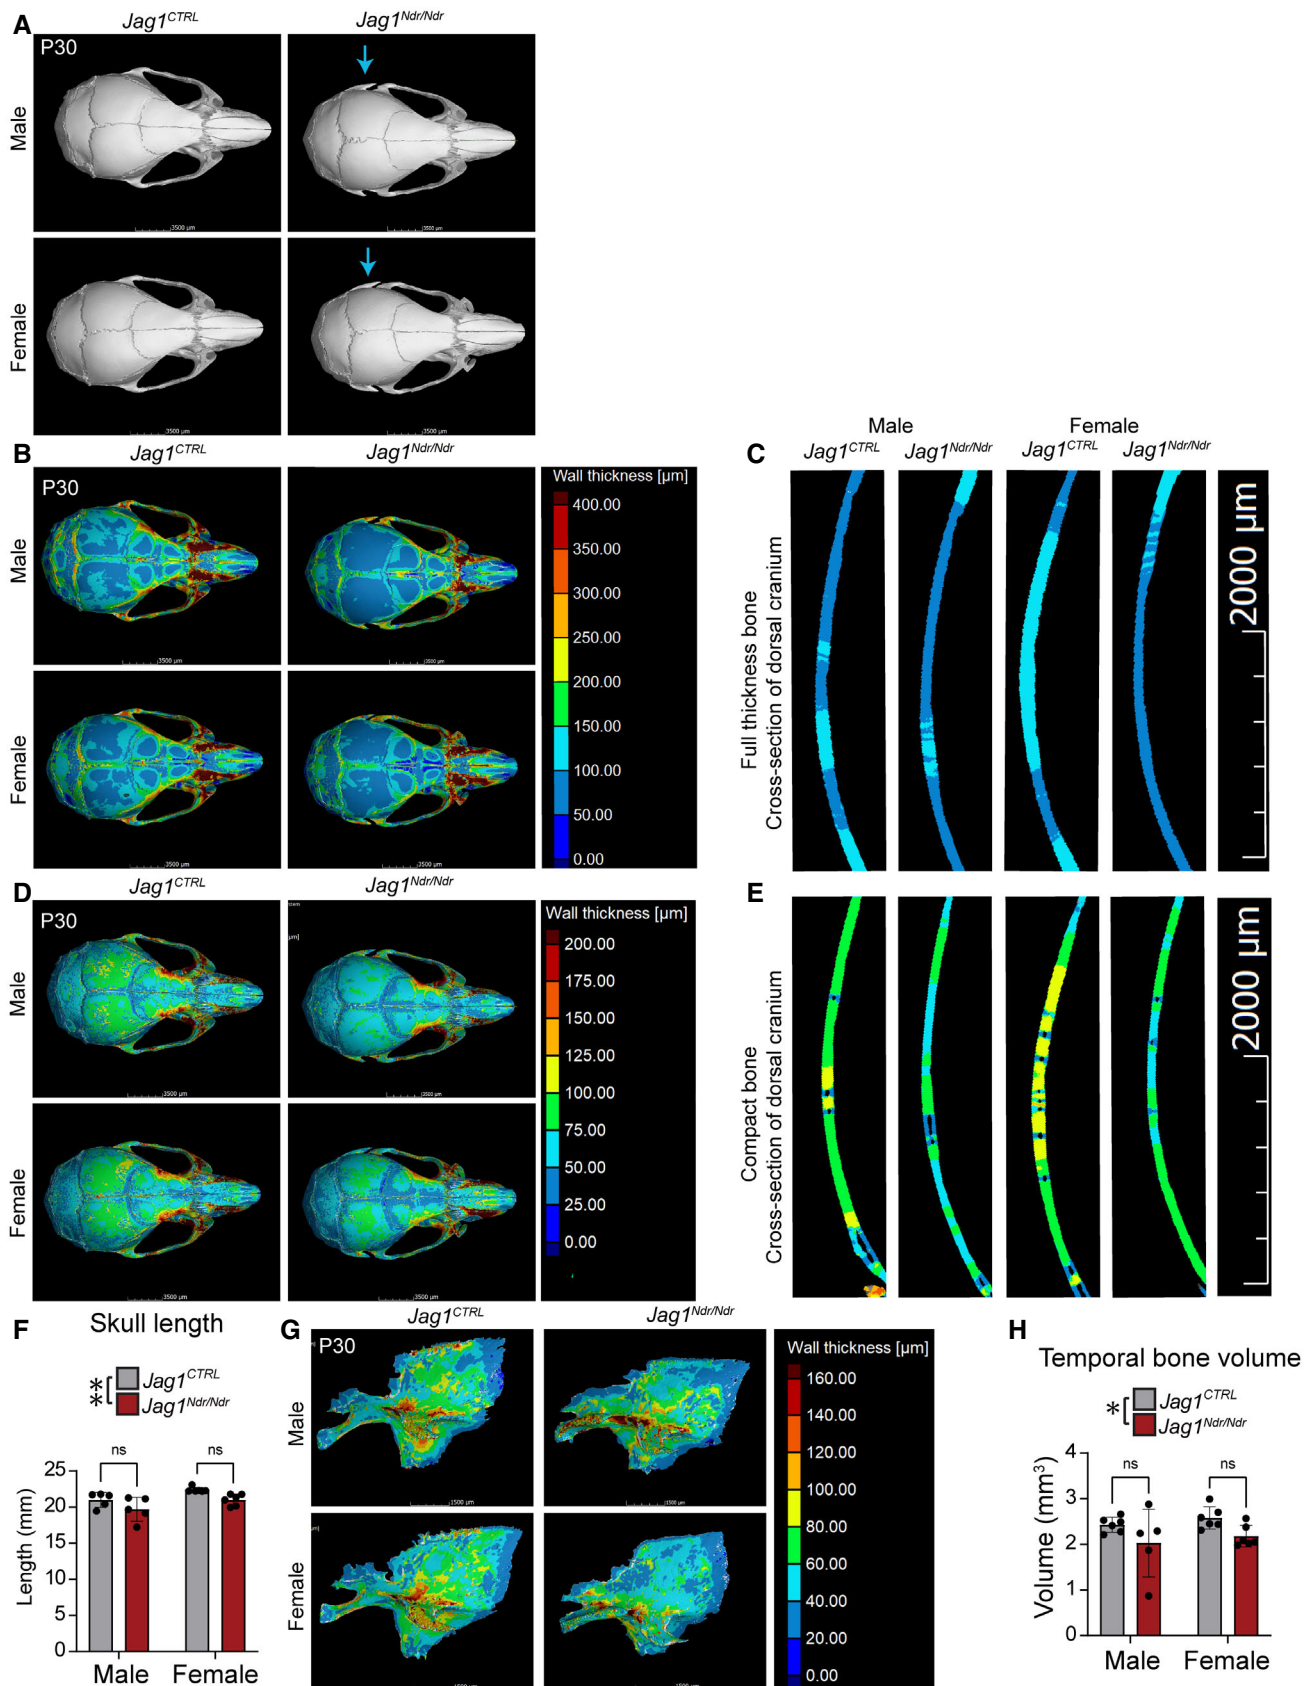

Figure EV1.

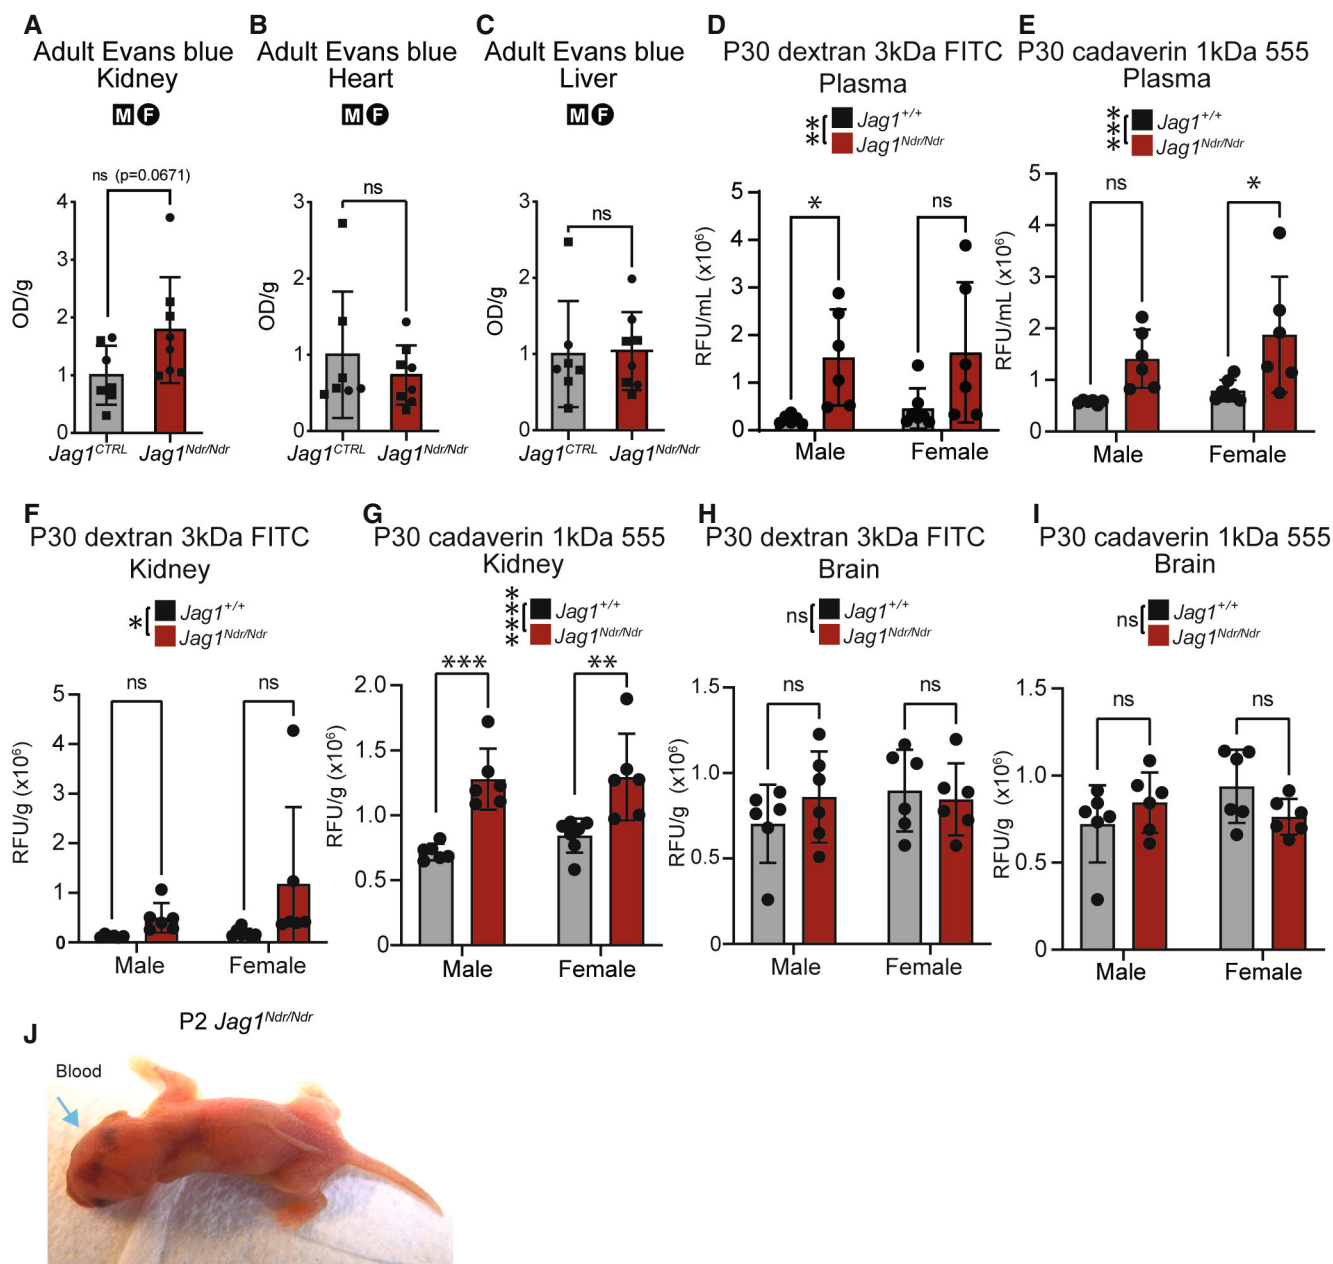

**Figure EV2.  $Jag1^{Ndr/Ndr}$  mice exhibit selective renal vascular permeability.**

- A–C Relative vascular leakage as assessed by Evans blue extracted from adult (A) kidney ( $P = 0.0671$ , ns), (B) heart ( $P = 0.4316$ , ns), and (C) liver ( $P = 0.8988$ , ns) of  $Jag1^{CTRL}$  and  $Jag1^{Ndr/Ndr}$  adult mice ( $n = 7$ –8 per group, Unpaired t-test).
- D, E Relative fluorescence in P30 plasma (D) of 3 kDa Dextran FITC (Two-way ANOVA on biological replicates/individual mice, followed by Šidák's multiple comparison test; Interaction  $P = 0.08663$ , Sex  $P = 0.6541$ , Genotype  $^{**}P = 0.0025$ ) or (E) 1 kDa Cadaverin 555 (Two-way ANOVA on biological replicates/individual mice followed by Šidák's multiple comparison test; Interaction  $P = 0.625$ , Sex  $P = 0.186$ , Genotype  $^{***}P = 0.0009$ ).
- F, G Relative vascular permeability in P30 kidney assessed by relative fluorescence of (F) 3 kDa Dextran FITC (Two-way ANOVA on biological replicates/individual mice, followed by Šidák's multiple comparison test; Interaction  $P = 0.3296$ , Sex  $P = 0.2374$ , Genotype  $^{*}P = 0.0384$ ) (G) or 1 kDa Cadaverin 555 (Two-way ANOVA on biological replicates/individual mice, followed by Šidák's multiple comparison test; Interaction  $P = 0.5308$ , Sex  $P = 0.4112$ , Genotype  $^{****}P < 0.0001$ ).
- H, I Relative vascular permeability in P30 brain assessed by relative fluorescence of (H) 3 kDa Dextran FITC (Two-way ANOVA on biological replicates/individual mice, followed by Šidák's multiple comparison test; Interaction  $P = 0.2942$ , Sex  $P = 0.3624$ , Genotype  $P = 0.591$ ) or (I) 1 kDa Cadaverin 555 (Two-way ANOVA on biological replicates/individual mice, followed by Šidák's multiple comparison test; Interaction  $P = 0.0596$ , Sex  $P = 0.3806$ , Genotype  $P = 0.7301$ ).
- J Hemorrhages in brain and body of one  $Jag1^{Ndr/Ndr}$  pup at P2, corresponding to brain data in Fig 2M, brain dissected out the next day at P3

Data information: Bar graphs depict mean values  $\pm$  standard deviation, each dot represents one biological replicate. Circles represent females, squares represent males (A–C). For details/results of statistical analyses, please see source data. Source data are available online for this figure.

**Figure EV3. Delayed retinal vascular outgrowth and remodeling in *Jag1<sup>Ndr/Ndr</sup>* mice.**

- A Schematic depicting retinal angiogenesis between P0 and P15. S, superficial; I, intermediate; D, deep capillary plexus.
- B–F (B) P5 retinal vascular outgrowth, (C) quantified ( $n = 6$  per group, unpaired  $t$ -test,  $*P = 0.0388$ ). Scale bar 100  $\mu\text{m}$ . (D) P5 vascular front with tip cells (boxed region). White arrowhead points to ERG+ tip cell nucleus, (E) quantified ( $n = 6$ , unpaired  $t$ -test,  $P = 0.1281$ , ns), blue arrowheads point to tips (bundles of filopodia) of tip cell (F) quantified ( $n = 6$ , unpaired  $t$ -test,  $**P = 0.0059$ ). Scale bar 20  $\mu\text{m}$ .
- G–M Retinal vasculature at (G) P5, (H) P10, (I) P15. Scale bar (G) 50  $\mu\text{m}$ , (H, I) 20  $\mu\text{m}$ . Retinal blood vessel remodeling quantification at P5, P10, and P15 (J) vascular length per field (Two-way ANOVA on biological replicates/individual mice. Interaction  $****P < 0.0001$ , Age  $***P = 0.0006$ , Genotype  $P = 0.2023$ . Šidák's multiple comparison test: P5 *Jag1<sup>CTRL</sup>* vs. *Jag1<sup>Ndr/Ndr</sup>*  $****P < 0.0001$ ; P15 *Jag1<sup>CTRL</sup>* vs. *Jag1<sup>Ndr/Ndr</sup>*  $*P = 0.0233$ ), (K) number of ERG+ cells per field (Two-way ANOVA on biological replicates/individual mice. Interaction  $****P < 0.0001$ , Age  $****P < 0.0001$ , Genotype  $P = 0.7656$ . Šidák's multiple comparison test: P5 *Jag1<sup>CTRL</sup>* vs *Jag1<sup>Ndr/Ndr</sup>*  $**P = 0.0013$ ; P15 *Jag1<sup>CTRL</sup>* vs *Jag1<sup>Ndr/Ndr</sup>*  $*P = 0.0217$ ), (L) number of ERG+ cells per vascular length (Two-way ANOVA on biological replicates/individual mice. Interaction  $P = 0.4617$ , Age  $**P = 0.0018$ , Genotype  $P = 0.2235$ ), (M) number of branching points per field ( $n = 6$  per group, Two-way ANOVA on biological replicates/individual mice. Interaction  $****P < 0.0001$ , Age  $****P < 0.0001$ , Genotype  $P = 0.2719$ . Šidák's multiple comparison test: P5 *Jag1<sup>CTRL</sup>* vs. *Jag1<sup>Ndr/Ndr</sup>*  $****P < 0.0001$ ).
- N Immunofluorescence of PH3+ proliferating CD31+ endothelial cells at P5. The dotted line labels the edge of the vascular front. Quantification of the number of proliferating cells per radial zone, normalized to area size at P5 ( $n = 4$ , Two-way ANOVA on biological replicates/individual mice. Interaction  $P = 0.3044$ , Zone  $****P < 0.0001$ , Genotype  $*P = 0.0165$ ). Scale bar 50  $\mu\text{m}$ .
- O, P (O) Delta like 4 in P5 vasculature. Scale bar 20  $\mu\text{m}$ . White brackets denote high DLL4 activity. (P) *Dll4* relative mRNA levels in whole retina lysates ( $n = 6$ , unpaired  $t$ -test,  $*P = 0.0461$ ).

Data information: Bar graphs depict mean values  $\pm$  standard deviation, each dot represents one biological replicate. Circles represent females, squares represent males. For details/results of statistical analyses, please see source data. Source data are available online for this figure.



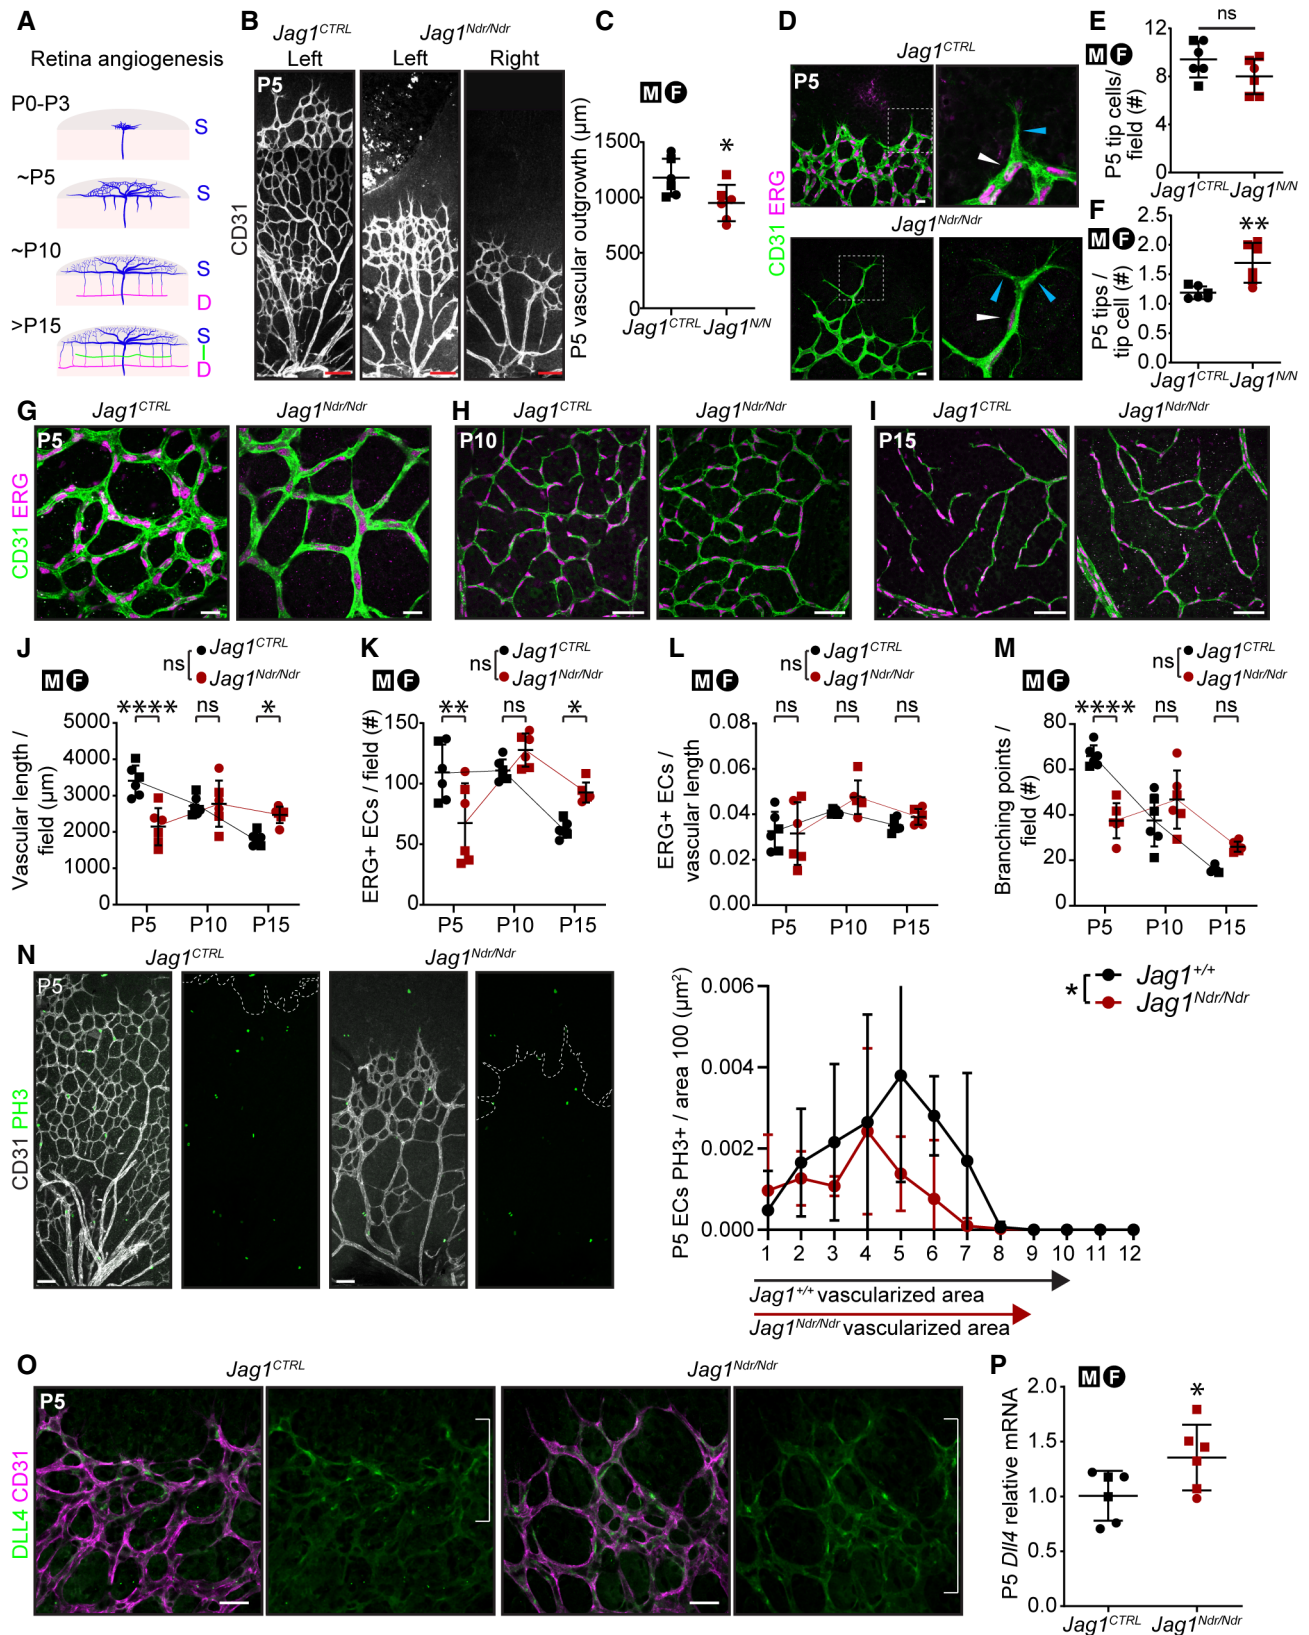

**Figure EV4. *Jag1<sup>Ndr/Ndr</sup>* mice display CADASIL-like sparse vascular smooth muscle cell coverage of arteries with an increase in artery-associated reactive astrocytes.**

- A, B (A) CD13 pericyte coverage of blood vessels was not reduced in adult *Jag1<sup>Ndr/Ndr</sup>* mice. Scale bars 20  $\mu\text{m}$ . (B) Quantification of CD13 intensity per field ( $n = 5-6$  per group, Two-way ANOVA followed by Šídák's multiple comparison test, Interaction  $P = 0.0737$ , Sex  $P = 0.1642$ , Genotype  $P = 0.3706$ ).
- C Transmission electron microscopy of coronary arteries of adult mice. Vascular smooth muscle cells (SMC) are pseudo-colored in magenta and endothelial cells (ECs) in green. White arrowheads label SMC edges and the distances between SMCs. Green arrowhead marks the tight junctions. Scale bars 2  $\mu\text{m}$ .
- D, E (D) Staining for contractile ( $\alpha\text{SMA}$ , SM22) and synthetic (VIM) vascular SMC (E) with quantification ( $n = 6-9$  per group, Multiple unpaired  $t$ -tests,  $\alpha\text{SMA}$   $*P = 0.0214$ , SM22  $*P = 0.0302$ , VIM  $P = 0.6801$ ). Boxed region indicates region with  $\alpha\text{SMA}$ -negative gap (labeled by white arrowhead). Scale bar 20  $\mu\text{m}$ .
- F, G (F) Staining for contractile ( $\alpha\text{SMA}$ , MYH11) and synthetic (COL1) vascular SMC. Boxed region indicates region with  $\alpha\text{SMA}$ -negative gap (labeled by white arrowhead). Scale bar 20  $\mu\text{m}$ . (G) Relative decrease in fluorescence intensity of different vascular SMC markers within gap compared to within vascular SMC (set to 100%), ( $n = 5-11$  per group, one-way ANOVA  $P < 0.0001$ , followed by Dunnett's multiple comparisons test: ASMA vs. COL1 Adjusted  $**P = 0.0066$ , ASMA vs. VIM adjusted  $****P < 0.0001$ ).
- H–K (H) GFAP<sup>+</sup> astrocytes are more prevalent around adult *Jag1<sup>Ndr/Ndr</sup>* arterioles (I) but not veins. White arrowheads label reactive astrocytes. Scale bars 20  $\mu\text{m}$ . (J, K) Quantification of mean GFAP intensity on retinal (J) arterioles ( $n = 4$ , unpaired  $t$ -test,  $**P = 0.0052$ ), (K) venules ( $n = 4$ , unpaired  $t$ -test,  $P = 0.6547$ ).
- L, M (L) Number of arteriolar first-generation branch points in 1-year-old mice ( $n = 6$ , unpaired  $t$ -test,  $P = 0.6823$ ). (M) Number of cCasp3<sup>+</sup> cells associated with first-generation arteriolar branching point ( $n = 6$ , unpaired  $t$ -test,  $*P = 0.0153$ ).
- N Evans blue extracted from liver, kidney, and heart of mice treated with PBS or Angiotensin II ( $n = 4-5$  per group, two-way ANOVA with Subject matching. Interaction  $P = 0.2576$ , Organ  $P = 0.0011$ , Genotype & Treatment  $P = 0.2086$  Subject  $***P = 0.0004$ , followed by Tukey's multiple comparison test, *Jag1<sup>+/+</sup>* vs. *Jag1<sup>+/+</sup>* AngII  $*P < 0.05$ ).

Data information: Bar graphs depict mean values  $\pm$  standard deviation, each dot represents one biological replicate. Circles represent females, squares represent males. For details/results of statistical analyses, please see source data. A, arteriole; AngII, Angiotensin II; EC, endothelial cell; SMC, smooth muscle cell; V, venule. Source data are available online for this figure.

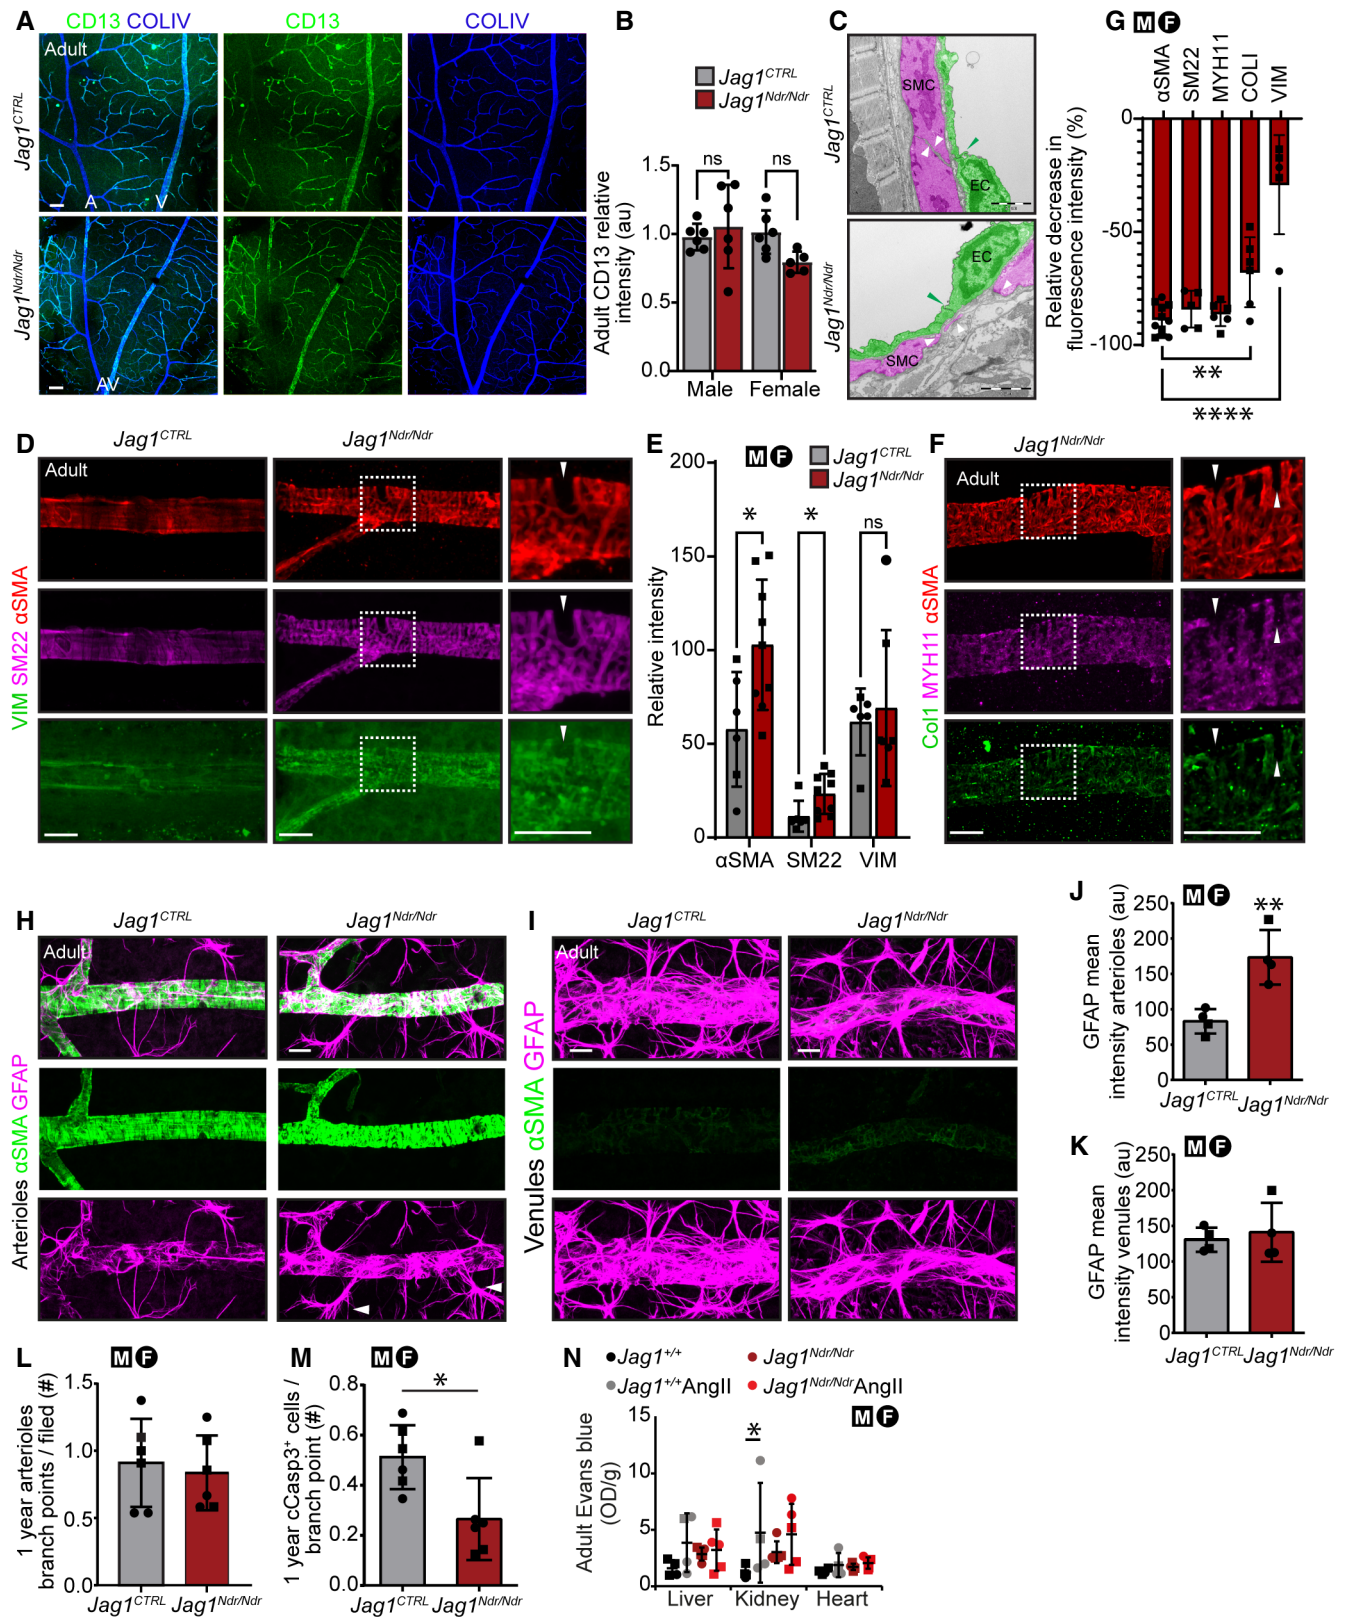

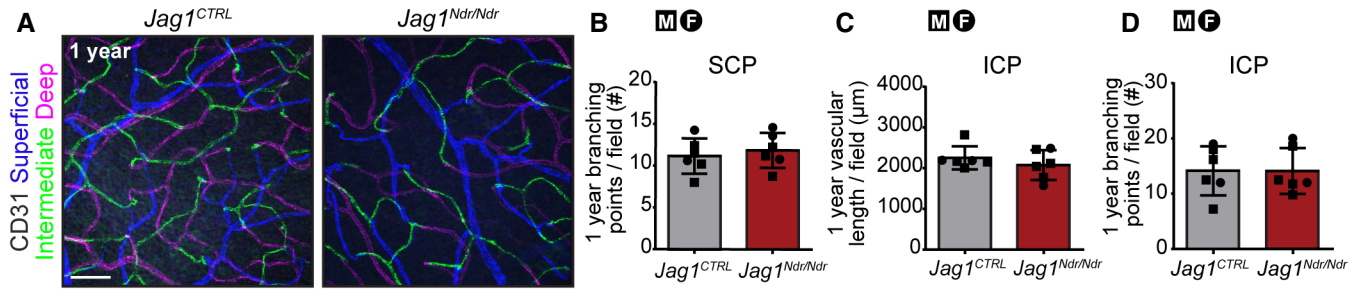

**Figure EV5. Aging retina capillary network in 1-year-old mice.**

- A One-year-old retina three CD31+ capillary layers. Scale bar 50 µm.
- B One-year-old SCP branching point number ( $n = 6$  per group, unpaired t-test,  $P = 0.5730$ ).
- C One-year-old ICP vascular length ( $n = 6$  per group, unpaired t-test,  $P = 0.3686$ ).
- D One-year-old ICP branching point number ( $n = 6$  per group, unpaired t-test,  $P = 0.9869$ ).

Data information: Bar graphs depict mean values  $\pm$  standard deviation, each dot represents one biological replicate. Circles represent females, squares represent males. For details/results of statistical analyses, please see source data. ICP, intermediate capillary plexus; SCP, superficial capillary plexus. Source data are available online for this figure.
